# Supplementary figures and images for: Carbon and nutrient export regimes from headwatercatchments to downstream reaches
Source: Copernicus journal article supplement (doi:10.5194/bg-2017-82), 2017-05-10

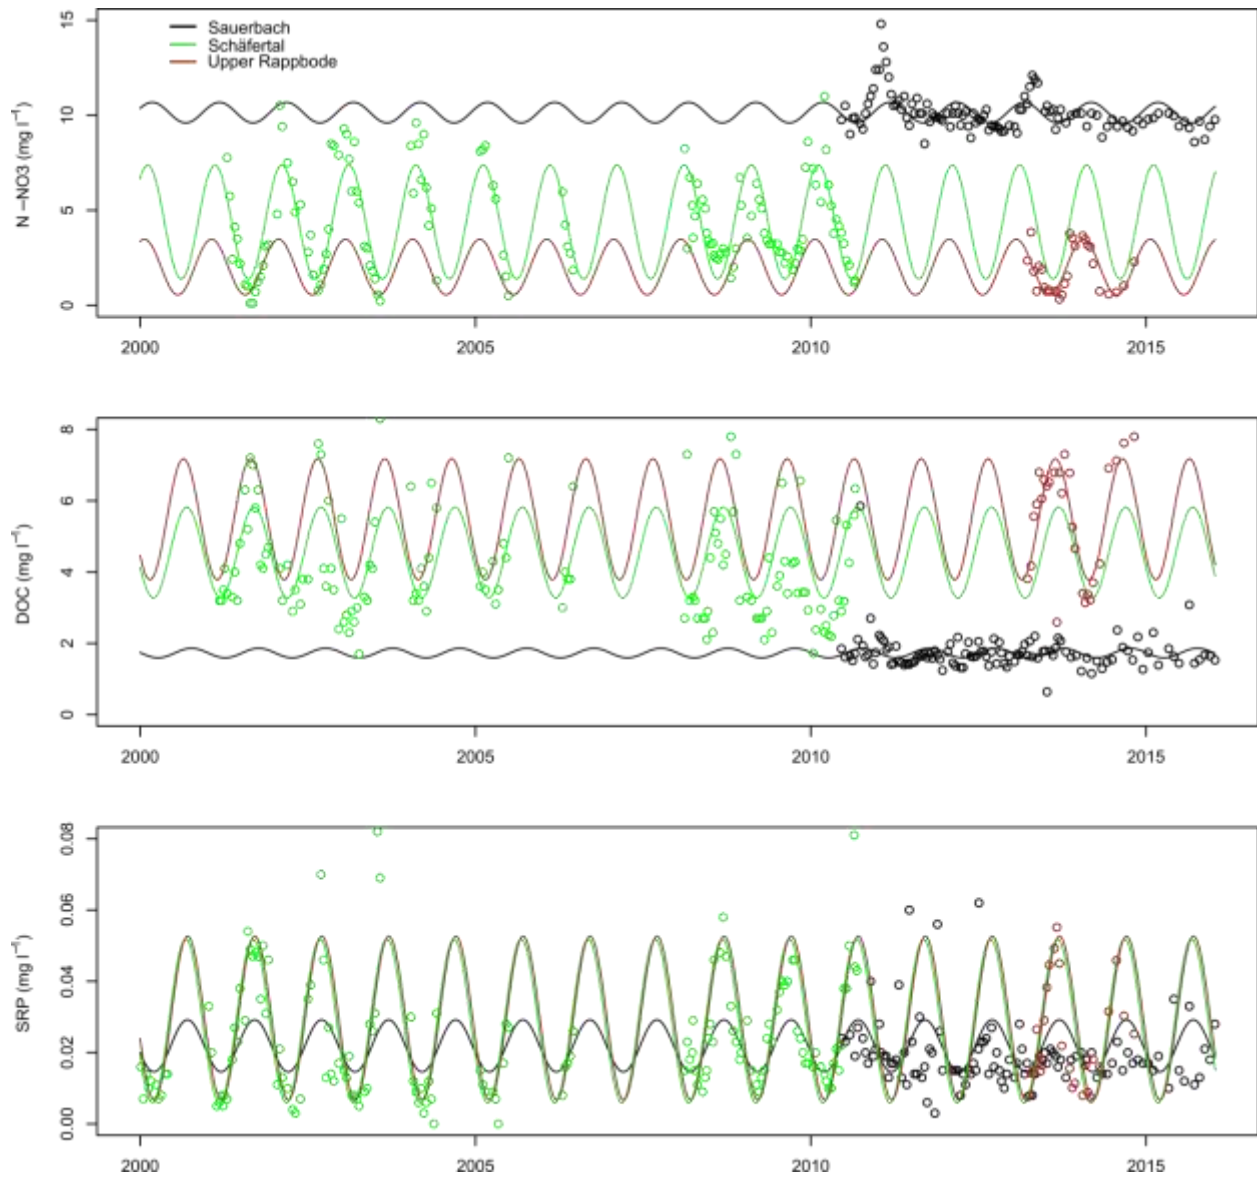

Figure S1: Grab sampling data in 3 headwater catchments and cosine fitting.

Supplement: Supplementary file 1 [file bg-2017-82-supplement.pdf]
